# Supplementary material for: Increased Expression of Toll-Like Receptor 4 in Skin of Dogs with Discoid Lupus Erythematous (DLE)
Source: PubMed Central journal article supplement (PMC8067959; doi:10.3390/ani11041044), 2021-04-08
Supplement: animals-11-01044-s001.pdf [file animals-11-01044-s001.pdf]

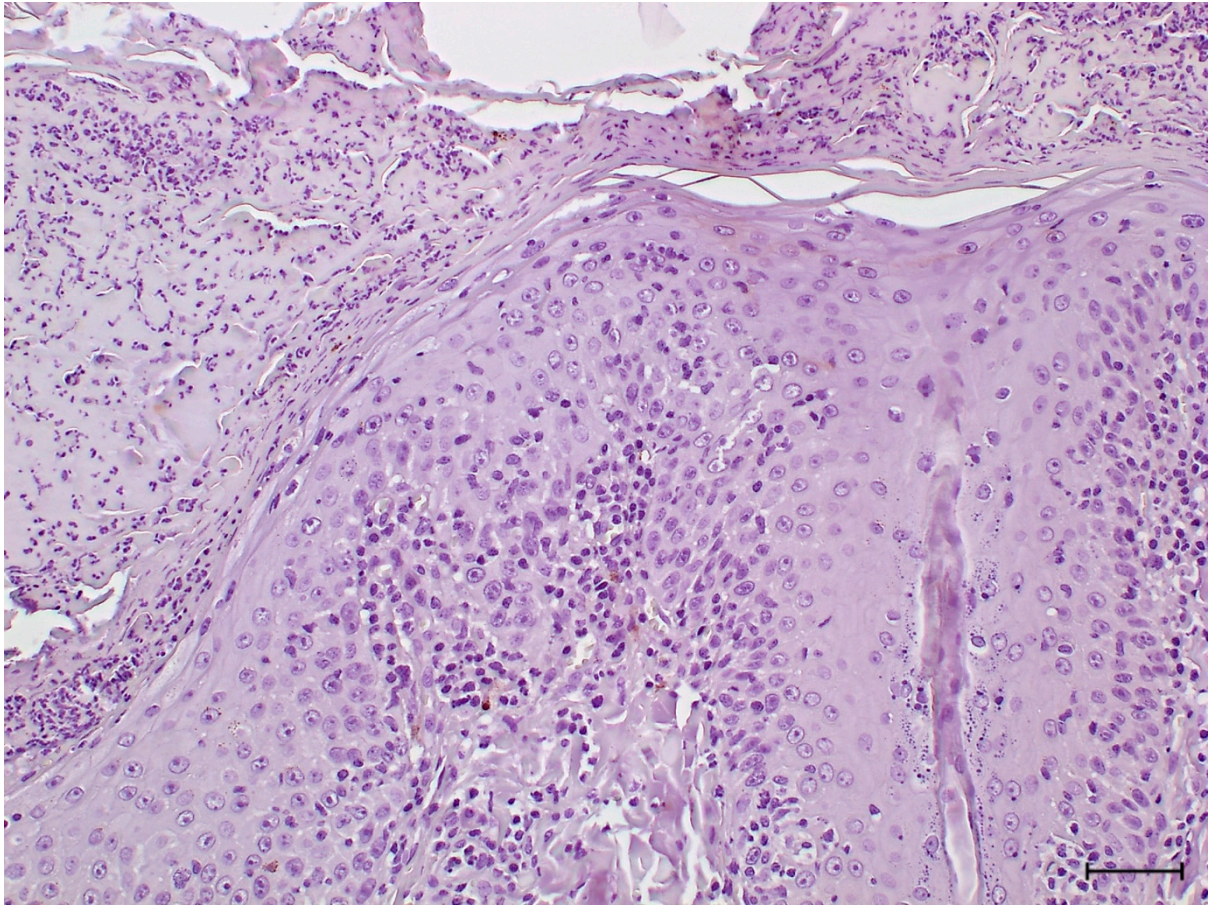

**Figure S1.** Immunohistochemical analysis for TLR4. Case of DLE: negative control using a blocking peptide specific for the TLR4 antibody used; scale bar 50  $\mu$ m.
